# Supplementary material
Source: Springer Nature journal article supplement (https://www.springermedizin.de/resource/supplementary/12978_2012_179_MOESM1_ESM.pdf/9603002)
Supplement: MOESM1 [file 9603002]

**731 publications identified:**

545 papers from search strategy, 99 found as related articles or directly from authors and 87 abstracts from AIDS conferences

**131 publications excluded:**

were found to be duplicates

**599 papers and 33 abstracts pre-selected and screened for titles**

**353 studies dropped:**

- not conducted in sub-Saharan Africa (167),
- studies not addressing the issue of determinants of male involvement in PMTCT (89)
- published in languages other than English (62),
- reports of activity implementations (35)

**247 studies potentially relevant and screened for abstracts**

**148 studies excluded:**

- studies not addressing the issue of determinants of male involvement in PMTCT (98)
- papers related to the tools/instrument developments (19)
- published before 1990 (16)
- comments, debates (15)

**96 studies screened using full-text and 3 abstracts from AIDS conferences selected**

**66 full text articles excluded:**

- not addressing the issue of determinants MIP (53)
- reports of activity implementations (8)
- Comments, debates (5)

**31 full-text publications and 3 abstracts finally included in this review**
